# Supplementary material for: Highly selective and efficient adsorption dyes self-assembled by 3D hierarchical architecture of molybdenum oxide
Source: Royal Society of Chemistry journal article supplement (doi:10.1039/c5ra18442h), 2015-01-01
Supplement: c5ra18442h1.pdf [file c5ra18442h1.pdf]

# Highly Selective and Efficient Adsorption Dyes Self- assembled by 3D Hierarchical Architecture of Molybdenum Oxide

Min Wang,<sup>a</sup> Xiao-xiao Song,<sup>a</sup> Xiao-Li Cheng<sup>a</sup>, Xin Zhou,<sup>‡b</sup> Xian-fa Zhang,<sup>a</sup> Zhuang  
Cai, Ying-Ming Xu,<sup>\*a</sup> Shan Gao,<sup>a</sup> Hui Zhao,<sup>a</sup> Li-Hua Huo<sup>\*,a</sup>

[\*] Prof. L. H. Huo

[‡] The first author of theoretical calculation

<sup>a</sup>Key Laboratory of Functional Inorganic Material Chemistry, Ministry of Education,  
School of Chemistry and Materials Science, Heilongjiang University, Harbin, 150080,  
China

<sup>b</sup>Institute of Theoretical and Simulational Chemistry, Academy of Fundamental and  
Interdisciplinary Science, Harbin Institute of Technology, Harbin, 150080, People's  
Republic of China

E-mail address: lhhuo68@yahoo.com

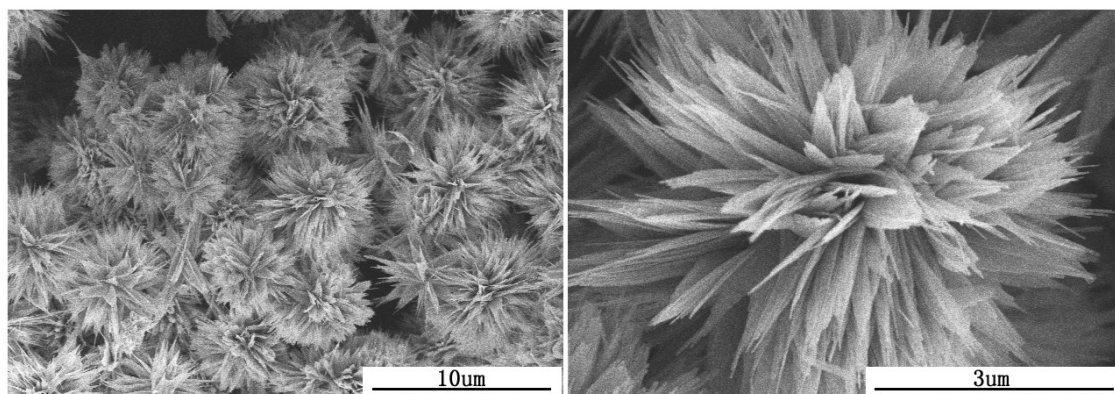

**Figure S1** Low-magnification (a) and high-magnification (b) SEM images of the MoO<sub>3</sub> flower-like microspheres calcined at 250 °C

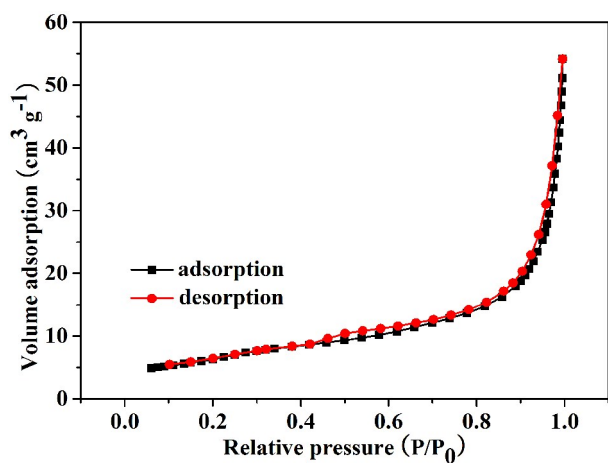

**Figure S2** Nitrogen adsorption-desorption isotherms of nanoflower-like  $\alpha$ -MoO<sub>3</sub>

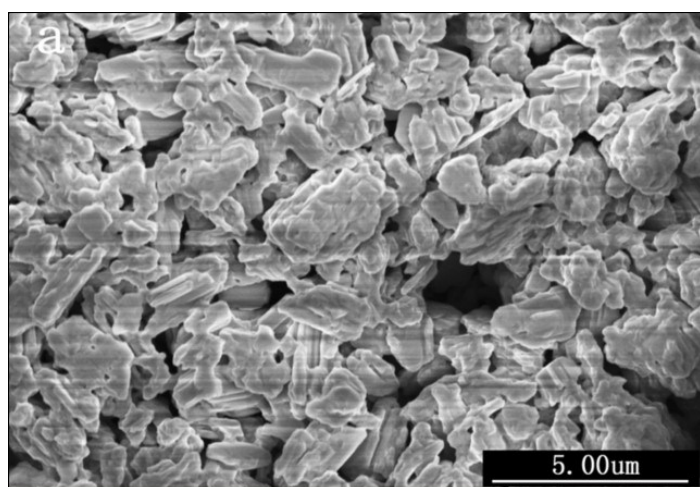

**Figure S3** Typical SEM image of the commercial  $\alpha$ -MoO<sub>3</sub>

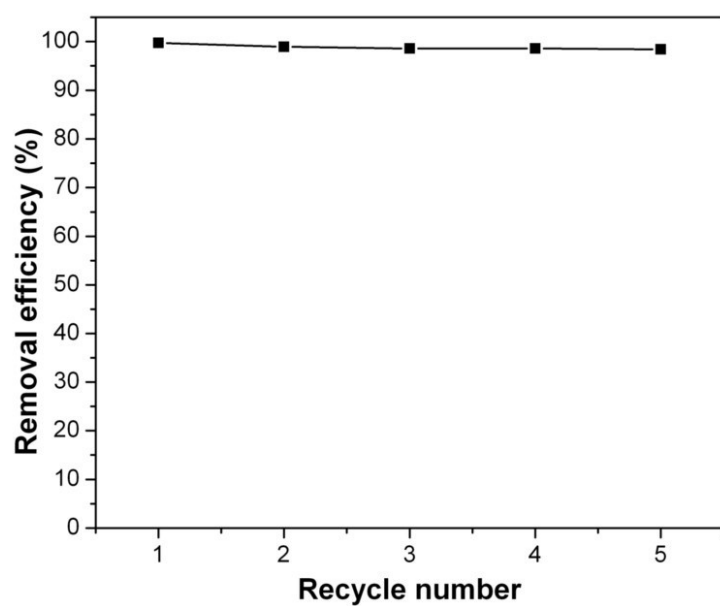

**Figure S4** The correlation between the removal efficiency of RhB and regeneration recycle numbers.

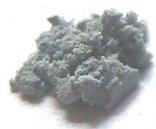

a

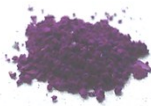

b

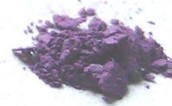

c

**Figure S5** The photographs of MoO<sub>3</sub> microspheres before (a) and after (b) adsorption of RhB, and ethanol washed sample (c) after adsorption.

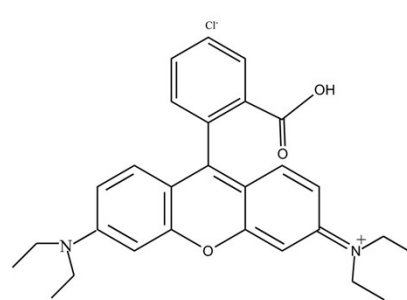

RhB

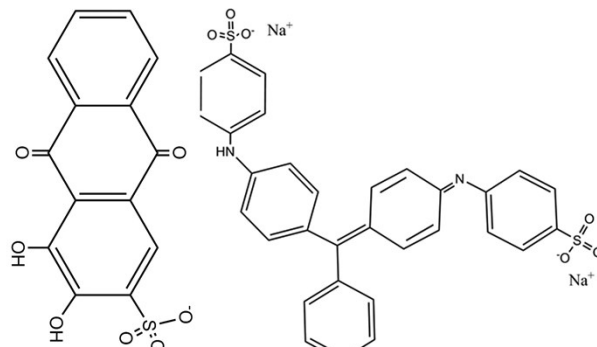

Alizarin red

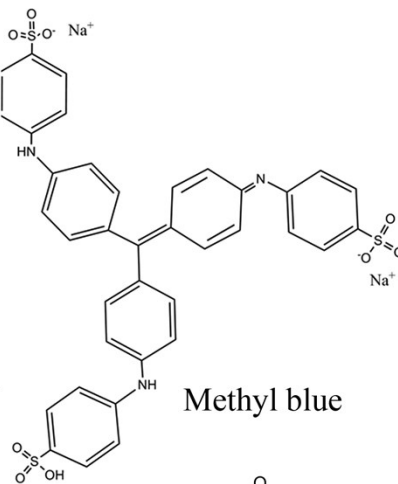

Methyl blue

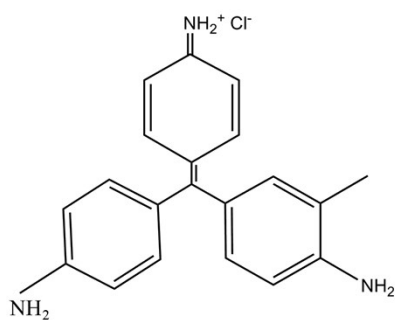

Fuchsine

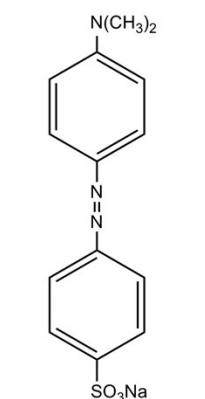

Methyl orange

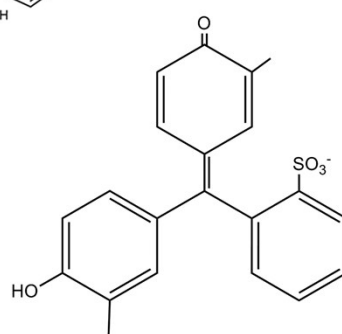

Cresol red

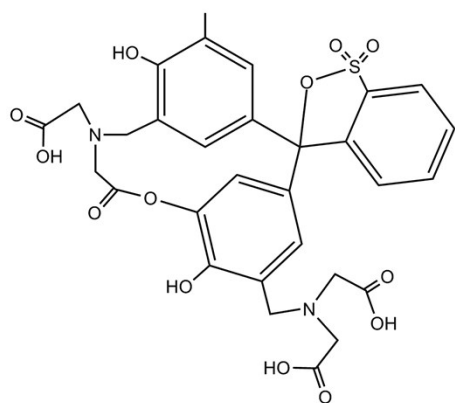

Xylenol orange

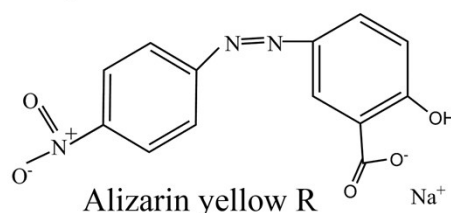

Alizarin yellow R

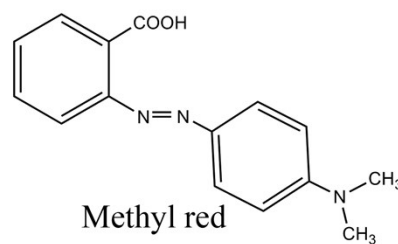

Methyl red

**Figure S6** The molecular structure diagrams of the nine adsorbed molecules

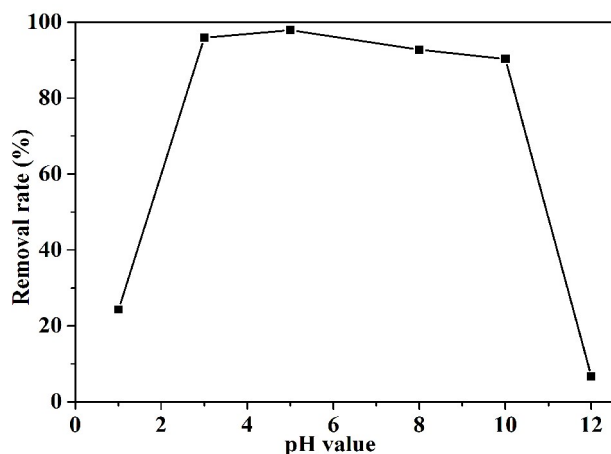

**Figure S7** pH values effect on adsorption performance

Three important surface structures of  $\alpha$ - $\text{MoO}_3$ , e.g. (010), (100), and (001) crystalline plane, were taken into account in the calculations. Their optimized geometry structures were shown in Figure S8. The three surface structures have identical type and number of atoms and hence should be isomers. The total energies (Figure S8) for the three structures are in the order (010) > (100) > (001) (the relative energies of them is 0 eV, 7.8 eV and 12.25 eV), which is in accordance with their sequence of surface areas.

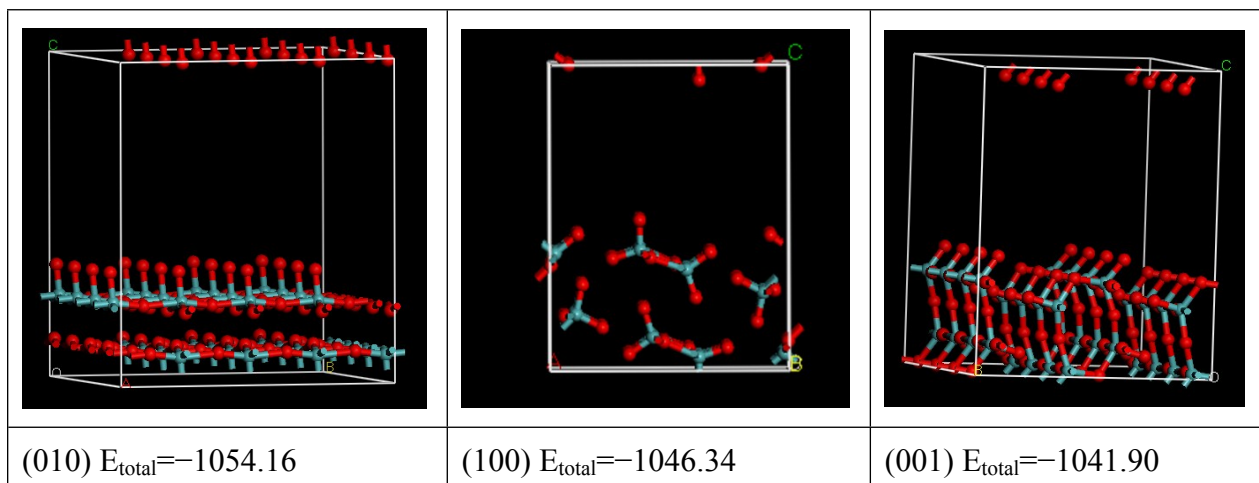

**Figure S8** The optimized structures for (010), (100), and (001) surfaces of  $\alpha$ - $\text{MoO}_3$  associated with their total energies in eV.

To clarify which crystalline plane ((010), (100), and (001)) of  $\alpha$ - $\text{MoO}_3$  has the most strong adsorption ability to organic molecules,  $\text{C}_6\text{H}_5\text{COOH}$  was selected as a test molecule. Taking into account various unsaturated sites on the surfaces of  $\alpha$ - $\text{MoO}_3$ ,

we obtained possible adsorption structures for the three surfaces, which were shown in Figure S9 associated with their binding energies. As seen in Figure S9, the adsorption ability of  $C_6H_5COOH$  to the surfaces of  $\alpha\text{-MoO}_3$  should be in the order  $(010) < (100) < (001)$ , just opposite to their stability order. It is not surprising that the  $(010)$  plane has the weakest adsorption to  $C_6H_5COOH$  because the terminal oxygen atoms of  $(010)$  surface prohibit the effective interaction between Mo and O atoms of  $C_6H_5COOH$ , which is the major contribution to the binding energy. With respect to  $(100)$  and  $(001)$  plane, although both of them have similar adsorption sites, the short  $Mo(\alpha\text{-MoO}_3)\text{-O}(C_6H_5COOH)$  distance (shown in Figure S9) can be responsible for the strongest adsorption of  $(001)$  surface to  $C_6H_5COOH$  molecule.

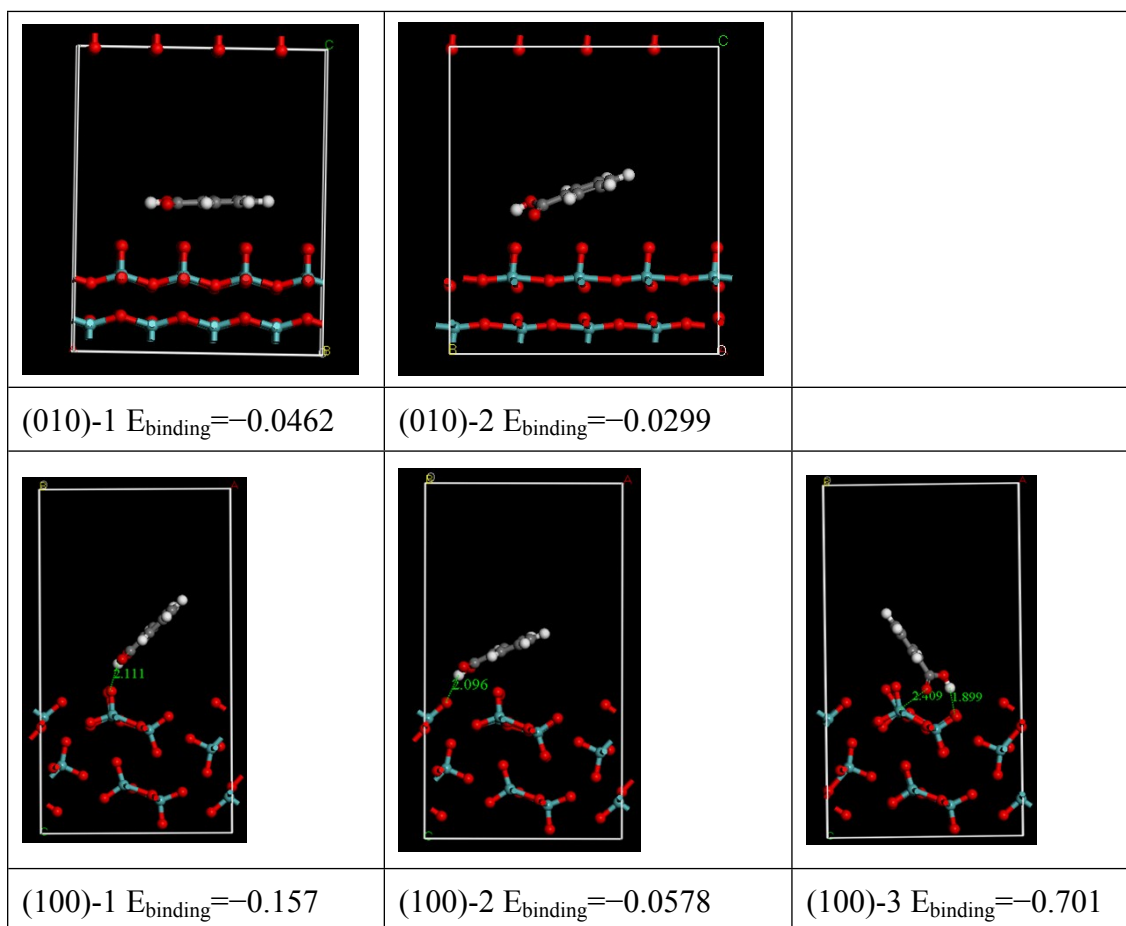

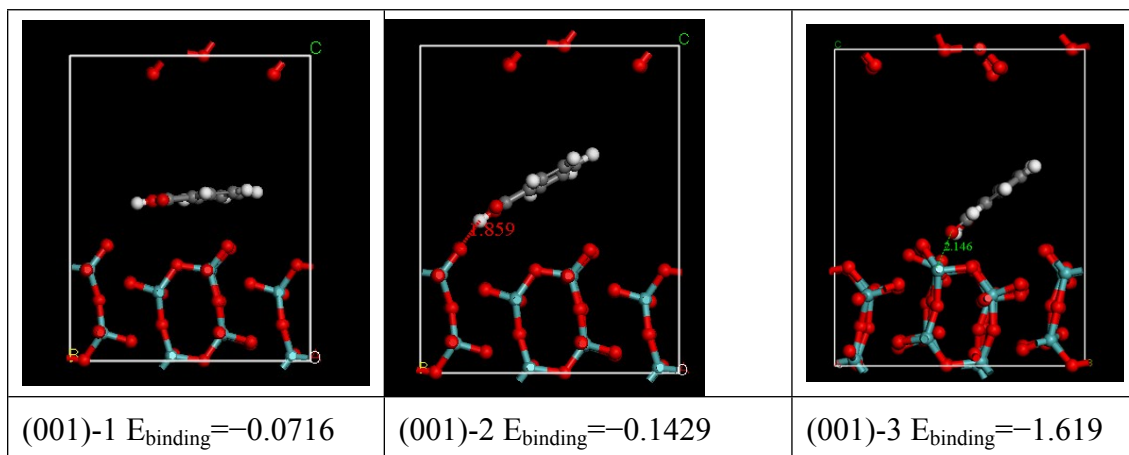

**Figure S9** Adsorption structures of  $\text{C}_6\text{H}_5\text{COOH}$  onto (010), (100), and (001) surfaces of  $\alpha\text{-MoO}_3$  associated with their binding energies in eV.
